# Supplementary material for: The Influence of Sugar Composition and pH Regulation in Batch and Continuous Acetone–Butanol–Ethanol Fermentation
Source: MDPI journal article supplement (doi:10.3390/fermentation8050226), 2022-05-15
Supplement: s1 [file s1]

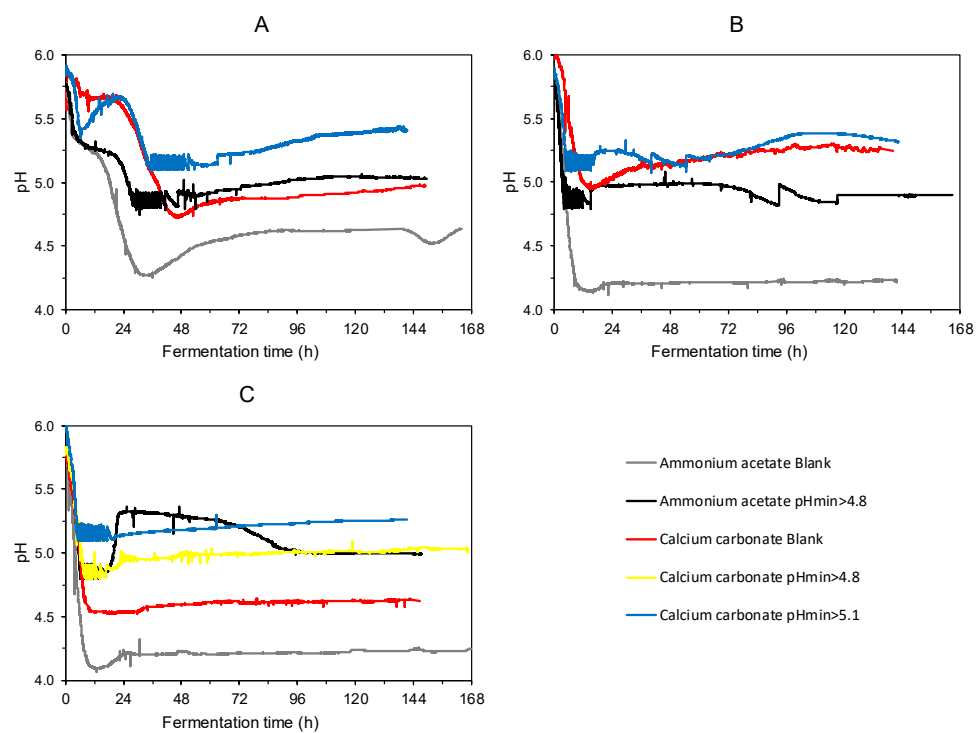

**Figure S1.** The pH profiles of *C. acetobutylicum* under different carbon sources (A) pure xylose, (B) ratio 1:1 (C) ratio 3:1 in batch mode.
